# Supplementary material for: Fluoride-free synthesis of high-silica, medium-pore zeolites PST-22 and PST-30
Source: Royal Society of Chemistry journal article supplement (doi:10.1039/d1qi01213d), 2021-11-08
Supplement: d1qi01213d1.pdf [file d1qi01213d1.pdf]

## Supplementary Information

### Fluoride-free synthesis of high-silica, medium-pore zeolites PST-22 and PST-30

Donghui Jo<sup>a</sup> and Suk Bong Hong<sup>\*b</sup>

*<sup>a</sup>Petrochemical Catalyst Research Center, Korea Research Institute of Chemical Technology,  
Daejeon 34114, Korea*

*<sup>‡</sup>Center for Ordered Nanoporous Materials Synthesis,*

*<sup>b</sup>Division of Environmental Science and Engineering, POSTECH, Pohang 37673, Korea*

\*E-mail: sbhong@postech.ac.kr

**Table S1** Representative products from zeolite syntheses using 14DMP-C<sub>4</sub><sup>2+</sup> or 13DMP-C<sub>4</sub><sup>2+</sup> as an OSDA in the presence of K<sup>+</sup> Ions

| R <sup>a</sup>                     | KOH/SiO <sub>2</sub> | Product <sup>b</sup>       |
|------------------------------------|----------------------|----------------------------|
| 14DMP-C <sub>4</sub> <sup>2+</sup> | 0.20                 | Amorphous                  |
|                                    | 0.25                 | Amorphous                  |
|                                    | 0.30                 | Amorphous                  |
|                                    | 0.35                 | Amorphous                  |
|                                    | 0.40                 | Amorphous                  |
| 13DMP-C <sub>4</sub> <sup>2+</sup> | 0.20                 | Amorphous                  |
|                                    | 0.25                 | Amorphous                  |
|                                    | 0.30                 | Amorphous + PST-30 + SUZ-4 |
|                                    | 0.35                 | SUZ-4                      |
|                                    | 0.40                 | SUZ-4                      |

<sup>a</sup> The composition of the synthesis mixture was 0.125RBr<sub>2</sub>·xK<sub>2</sub>O·1.0SiO<sub>2</sub>·0.05Al<sub>2</sub>O<sub>3</sub>·30H<sub>2</sub>O, where R is 14DMP-C<sub>4</sub><sup>2+</sup> or 13DMP-C<sub>4</sub><sup>2+</sup> and *x* is varied between 0.10 ≤ *x* ≤ 0.20. All syntheses were performed under rotation (60 rpm) at 175 °C for 7 days. <sup>b</sup> The product appearing first is the major phase.

**Table S2** Crystallographic and experimental parameters for the Rietveld refinement of as-made PST-22(OH) synthesized with 14DMP-C<sub>4</sub><sup>2+</sup> and Na<sup>+</sup> ions

---

|                                        |                                                                                                                                               |
|----------------------------------------|-----------------------------------------------------------------------------------------------------------------------------------------------|
| Chemical unit cell formula             | $(14\text{DMP-C}_4^{2+})_{1.7}(\text{H}_2\text{O})_{0.7}(\text{Na}^+)_{0.3}(\text{OH}^-)_{0.4}[\text{Al}_{3.3}\text{Si}_{36.7}\text{O}_{80}]$ |
| Refined unit cell formula              | $(14\text{DMP-C}_4^{2+})_2[\text{Si}_{40}\text{O}_{80}]$                                                                                      |
| Crystal system                         | monoclinic                                                                                                                                    |
| Space group                            | <i>C2/c</i> (no. 15)                                                                                                                          |
| <i>a</i> (Å)                           | 20.42404(18)                                                                                                                                  |
| <i>b</i> (Å)                           | 11.69690(9)                                                                                                                                   |
| <i>c</i> (Å)                           | 11.03974(10)                                                                                                                                  |
| $\beta$ (°)                            | 118.1157(5)                                                                                                                                   |
| Unit cell volume (Å <sup>3</sup> )     | 2326.155(34)                                                                                                                                  |
| X-ray source                           | 9B beamline, PAL                                                                                                                              |
| Wavelength (Å)                         | 1.5167                                                                                                                                        |
| Step size (°)                          | 0.01                                                                                                                                          |
| 2 $\theta$ scan range (°)              | 5-125.5                                                                                                                                       |
| No. of total reflections               | 1971                                                                                                                                          |
| No. of restraints                      | 54                                                                                                                                            |
| No. of parameters                      | 89                                                                                                                                            |
| <i>R</i> <sub>wp</sub> (%)             | 7.36                                                                                                                                          |
| <i>R</i> <sub>F</sub> <sup>2</sup> (%) | 5.13                                                                                                                                          |
| $\chi^2$                               | 5.63                                                                                                                                          |

---

**Table S3** Atomic coordinates and thermal parameters for as-made PST-22(OH)

| Atom | <i>x</i>    | <i>y</i>    | <i>z</i>    | Occupancy | <i>U</i> <sub>iso</sub> (× 100 Å <sup>2</sup> ) | Multiplicity |
|------|-------------|-------------|-------------|-----------|-------------------------------------------------|--------------|
| Si1  | 0.84150(9)  | 0.65365(16) | 0.37005(16) | 1         | 0.885(11)                                       | 8            |
| Si2  | 0.71334(9)  | 0.57440(16) | 0.43573(17) | 1         | 0.885(11)                                       | 8            |
| Si3  | 0.82952(9)  | 0.58494(16) | 0.75317(17) | 1         | 0.885(11)                                       | 8            |
| Si4  | 0.91722(9)  | 0.74669(17) | 0.65885(18) | 1         | 0.885(11)                                       | 8            |
| Si5  | 0.72830(10) | 0.32497(15) | 0.36582(17) | 1         | 0.885(11)                                       | 8            |
| O1   | 0.76526(8)  | 0.63326(21) | 0.37749(18) | 1         | 1.462(30)                                       | 8            |
| O2   | 0.86207(12) | 0.53885(14) | 0.31492(22) | 1         | 1.462(30)                                       | 8            |
| O3   | 0.90787(12) | 0.68302(21) | 0.52140(16) | 1         | 1.462(30)                                       | 8            |
| O4   | 0.83130(13) | 0.75795(17) | 1.26815(18) | 1         | 1.462(30)                                       | 8            |
| O5   | 0.76036(13) | 0.57209(24) | 0.60170(16) | 1         | 1.462(30)                                       | 8            |
| O6   | 0.63804(9)  | 0.64470(16) | 0.38646(25) | 1         | 1.462(30)                                       | 8            |
| O7   | 0.69368(12) | 0.44543(13) | 0.37842(23) | 1         | 1.462(30)                                       | 8            |
| O8   | 0.89507(9)  | 0.65872(17) | 0.74687(18) | 1         | 1.462(30)                                       | 8            |
| O9   | 0.80263(8)  | 0.65009(21) | 0.85127(17) | 1         | 1.462(30)                                       | 8            |
| O10  | 0.5         | 0.28942(30) | 0.75        | 1         | 1.462(30)                                       | 4            |
| O11  | 0.75        | 0.25        | 0.5         | 1         | 1.462(30)                                       | 4            |
| N1   | 0.52088(23) | 0.33786(30) | 0.32678(23) | 0.5       | 1.74(13)                                        | 8            |
| N2   | 0.50463(24) | 0.23621(24) | 0.26882(32) | 0.5       | 1.74(13)                                        | 8            |
| C1   | 0.46673(22) | 0.24866(30) | 0.13096(30) | 0.5       | 1.74(13)                                        | 8            |
| C2   | 0.45982(25) | 0.36430(34) | 0.10040(26) | 0.5       | 1.74(13)                                        | 8            |
| C3   | 0.49695(24) | 0.41720(22) | 0.2267(4)   | 0.5       | 1.74(13)                                        | 8            |
| C4   | 0.42243(32) | 0.4200(6)   | -0.0345(4)  | 0.5       | 1.74(13)                                        | 8            |
| C5   | 0.52381(29) | 0.12692(31) | 0.3356(6)   | 0.5       | 1.74(13)                                        | 8            |
| C6   | 0.55826(25) | 0.3666(5)   | 0.47089(27) | 0.5       | 1.74(13)                                        | 8            |
| C7   | 0.53878(19) | 0.4766(5)   | 0.5208(8)   | 0.5       | 1.74(13)                                        | 8            |

**Table S4** Selected bond lengths and angles for as-made PST-22(OH)

| Bond length (Å) |              | Bond angle (°) |               |
|-----------------|--------------|----------------|---------------|
| Si1-O1          | 1.6151(27)   | O1-Si1-O2      | 109.01(16)    |
| Si1-O2          | 1.6096(29)   | O1-Si1-O3      | 109.74(16)    |
| Si1-O3          | 1.6164(20)   | O1-Si1-O4      | 109.76(15)    |
| Si1-O4          | 1.6051(27)   | O2-Si1-O3      | 109.09(14)    |
| Si2-O1          | 1.6292(30)   | O2-Si1-O4      | 109.87(17)    |
| Si2-O5          | 1.6192(22)   | O3-Si1-O4      | 109.36(15)    |
| Si2-O6          | 1.5967(25)   | O1-Si2-O5      | 107.73(14)    |
| Si2-O7          | 1.6117(24)   | O1-Si2-O6      | 110.46(16)    |
| Si3-O2          | 1.6051(24)   | O1-Si2-O7      | 109.19(18)    |
| Si3-O5          | 1.6086(21)   | O5-Si2-O6      | 110.88(19)    |
| Si3-O8          | 1.6217(29)   | O5-Si2-O7      | 109.50(16)    |
| Si3-O9          | 1.6173(31)   | O6-Si2-O7      | 109.06(13)    |
| Si4-O3          | 1.6189(29)   | O2-Si3-O5      | 110.01(16)    |
| Si4-O6          | 1.6141(26)   | O2-Si3-O8      | 108.25(15)    |
| Si4-O8          | 1.6192(31)   | O2-Si3-O9      | 110.12(17)    |
| Si4-O10         | 1.5867(19)   | O5-Si3-O8      | 110.09(16)    |
| Si5-O4          | 1.6084(22)   | O5-Si3-O9      | 109.34(15)    |
| Si5-O7          | 1.6116(27)   | O8-Si3-O9      | 109.01(15)    |
| Si5-O9          | 1.6264(29)   | O3-Si4-O6      | 108.37(15)    |
| Si5-O11         | 1.5940(18)   | O3-Si4-O8      | 109.10(16)    |
| Si1-O1          | 1.6151(27)   | O3-Si4-O10     | 111.04(16)    |
| Si1-O2          | 1.6096(29)   | O6-Si4-O8      | 109.51(18)    |
| Si1-O3          | 1.6164(20)   | O6-Si4-O10     | 109.21(18)    |
| Si1-O4          | 1.6051(27)   | O8-Si4-O10     | 109.58(13)    |
| Si-O (Avg.)     | 1.6118       | O4-Si5-O7      | 109.44(14)    |
| N1-N2           | 1.316500(10) | O4-Si5-O9      | 109.50(17)    |
| N1-C3           | 1.346300(10) | O4-Si5-O11     | 110.17(13)    |
| N1-C6           | 1.443040(10) | O7-Si5-O9      | 108.64(16)    |
| N2-C1           | 1.351440(10) | O7-Si5-O11     | 110.00(16)    |
| N2-C5           | 1.435020(10) | O9-Si5-O11     | 109.07(11)    |
| C1-N2           | 1.351440(10) | O-Si-O (Avg.)  | 109.47        |
| C1-C2           | 1.385080(10) | N1-N2-C1       | 109.2340(4)   |
| C2-C3           | 1.380110(10) | N2-C1-C2       | 108.54750(10) |
| C2-C4           | 1.467630(10) | C1-C2-C3       | 104.3240(4)   |
| C3-N1           | 1.346300(10) | C2-C3-N1       | 109.5252(7)   |
| C6-C7           | 1.524(7)     | C3-N1-N2       | 108.2232(6)   |
| C7-C7           | 1.528(9)     | N1-N2-C5       | 127.5559(6)   |
|                 |              | N2-N1-C6       | 128.87550(10) |
|                 |              | C1-N2-C5       | 123.19980(20) |
|                 |              | C1-C2-C4       | 128.71460(20) |
|                 |              | C3-N1-C6       | 122.8981(5)   |
|                 |              | C3-C2-C4       | 126.9595(6)   |
|                 |              | N1-C6-C7       | 120.18(30)    |
|                 |              | C6-C7-C7       | 127.2(6)      |

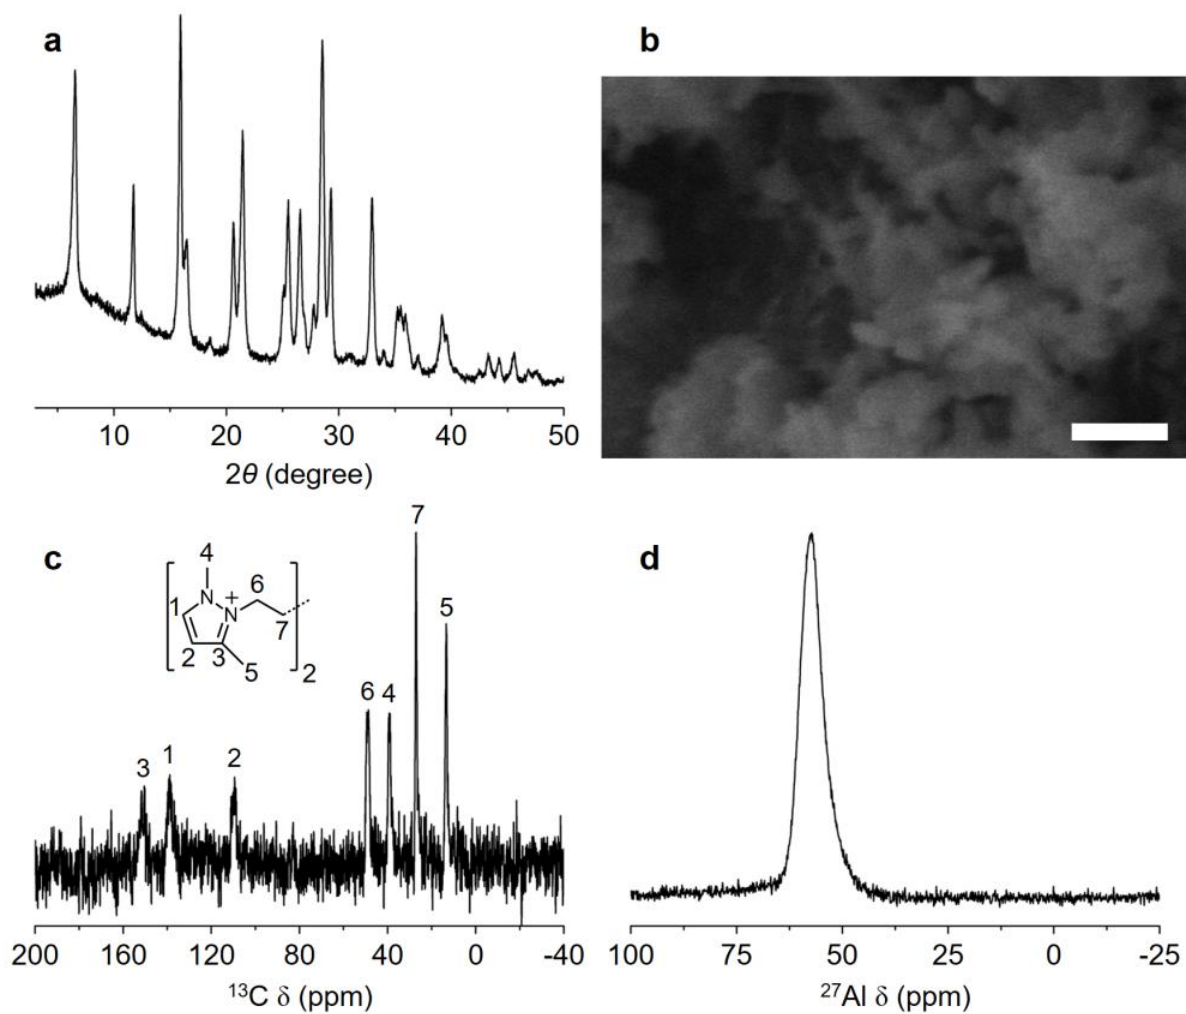

**Fig. S1** (a) PXRD pattern, (b) SEM image (scale bar, 1  $\mu\text{m}$ ), and (c)  $^1\text{H}$ - $^{13}\text{C}$  CP and (d)  $^{27}\text{Al}$  MAS NMR spectra of as-made SUZ-4 synthesized using  $^{13}\text{DMP-C}_4^{2+}$  as an OSDA, together with  $\text{K}^+$ .

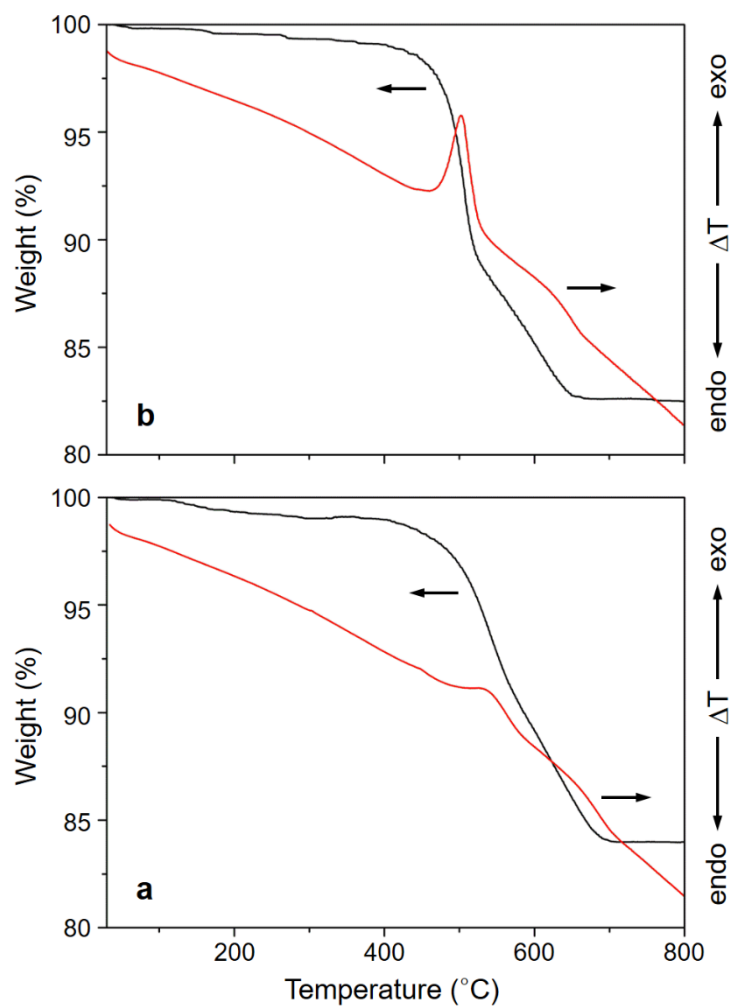

**Fig. S2** TGA/DTA profiles of as-made (a) PST-22(OH) and (b) PST-30(OH) synthesized in this study.

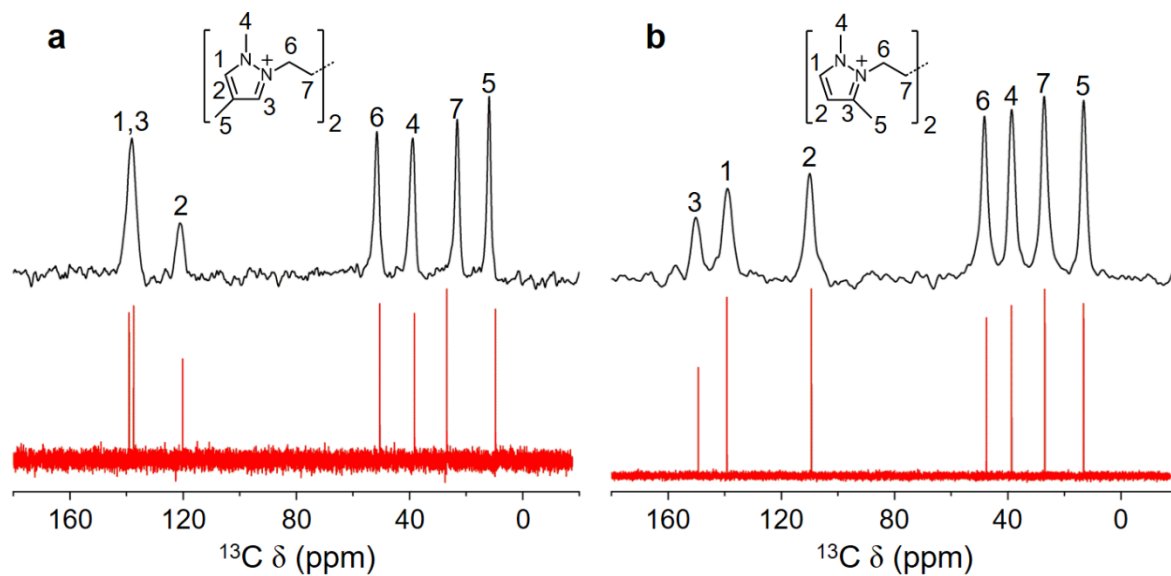

**Fig. S3**  $^1\text{H}$ - $^{13}\text{C}$  CP MAS NMR spectra (a) of as-made PST-22(OH) and (b) PST-30(OH). The bottom traces in red are the solution  $^{13}\text{C}$  NMR spectra of the dibromide salt of 14DMP- $\text{C}_4^{2+}$  and 13DMP- $\text{C}_4^{2+}$  in  $\text{D}_2\text{O}$ , which were used as an OSDA in the synthesis of these two zeolites, respectively.



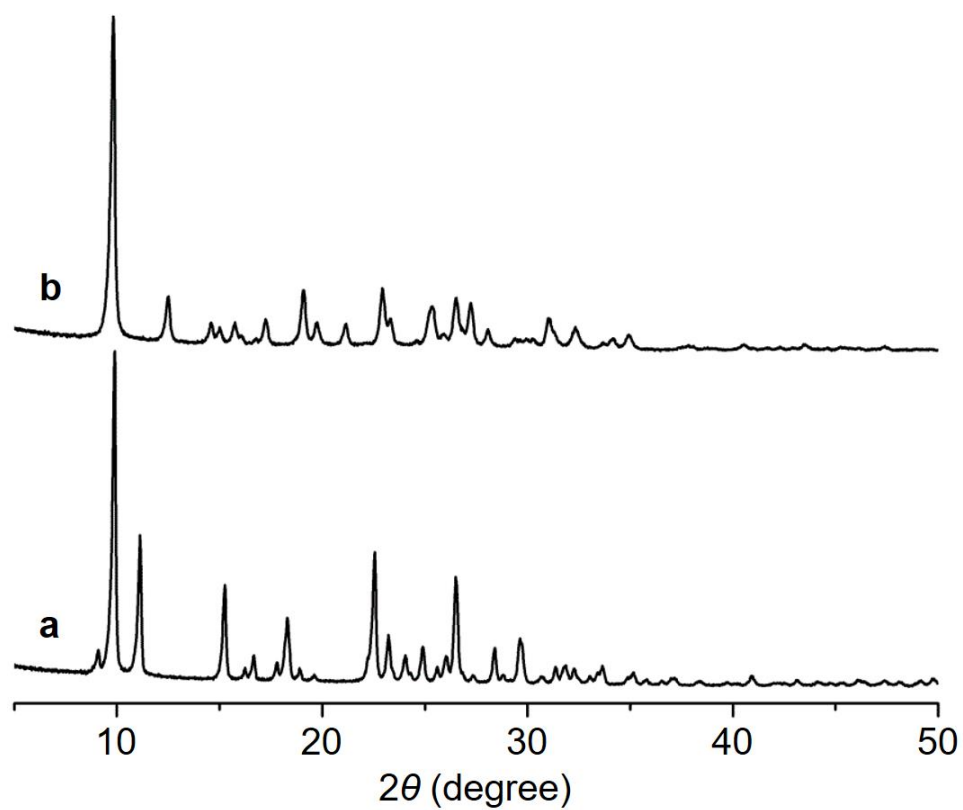

**Fig. S4** PXRd patterns of the proton form of (a) PST-22(OH) and (b) PST-30(OH) synthesized using 14DMP- $C_4^{2+}$  and 13DMP- $C_4^{2+}$  as an OSDA in hydroxide media, respectively.

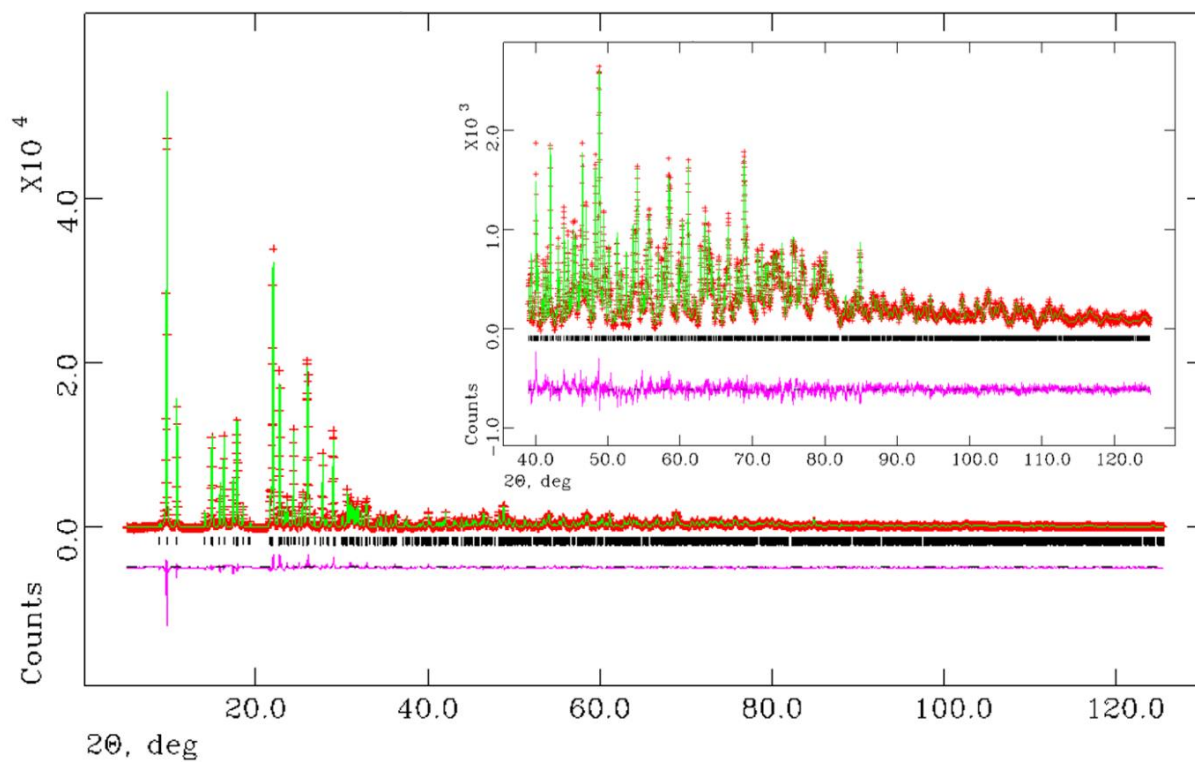

**Fig. S5** Rietveld plot for as-made PST-22(OH): observed data (+), calculated fit (solid line), and difference plot (lower trace). The tick marks represent the positions of allowed reflections.

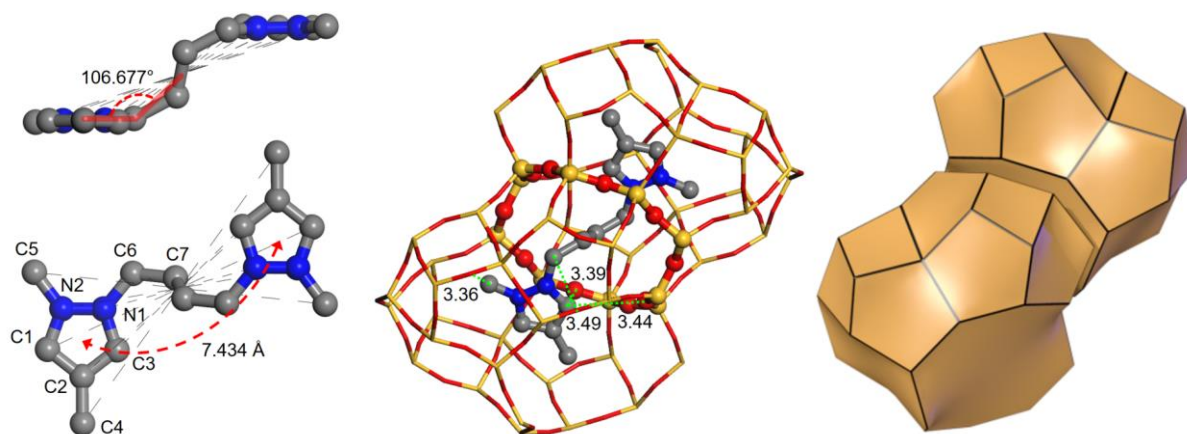

**Fig. S6** The crystallographically determined conformation (left and middle) of 14DMP- $C_4^{2+}$  encapsulated within two adjacent 18-hedral *t-pww* ( $[4^6.5^8.8^2.10^2]$ ) cages (right) of as-made PST-22(OH). The inversion center of 14DMP- $C_4^{2+}$  is guided with dashed lines (left). The 10-ring window connecting two *t-pww* cages is indicated by ball and stick model (middle). The distances between the host cage and the guest OSDA molecule, shorter than 3.5 Å, are also given: C2-O7, 3.39 Å; C3-O10, 3.44 Å; C5-O2, 3.36 Å; C6-O7, 3.49 Å.

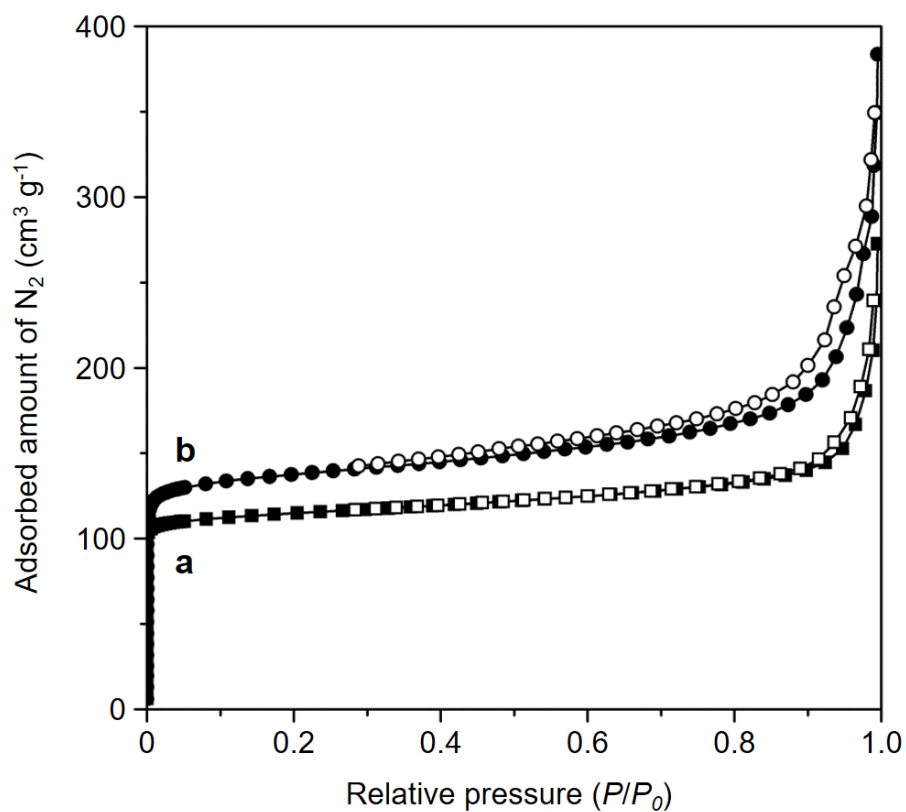

**Fig. S7** N<sub>2</sub> adsorption and desorption isotherms of (a) H-PST-22 (OH) and (b) H-PST-30(OH). Their BET surface areas were calculated to be 460 (microporous, 405; external, 55) and 545 (microporous, 460; external, 85) m<sup>2</sup> g<sup>-1</sup>, giving micropore volumes of 0.15 and 0.17 cm<sup>3</sup> g<sup>-1</sup>, respectively.
